# Supplementary material for: Modelling Degradation and Replication Kinetics of the Zika Virus In Vitro Infection
Source: PubMed Central journal article supplement (PMC7290367; doi:10.3390/v12050547), 2020-05-15
Supplement: viruses-12-00547-s001.pdf [file viruses-12-00547-s001.pdf]

# Supplementary Material

## Modelling degradation and replication kinetics of Zika virus *in vitro* infection

Veronika Bernhauerová<sup>1,2†</sup>, Veronica V. Rezelj<sup>1</sup>, Marco Vignuzzi<sup>1†</sup>

<sup>1</sup>Viral Populations and Pathogenesis Unit, Department of Virology, Institut Pasteur, CNRS UMR 3569, F-75015, Paris, France

<sup>2</sup>Department of Biophysics and Physical Chemistry, Faculty of Pharmacy, Charles University, Heyrovského 1203, 500 05 Hradec Králové, Czech Republic

<sup>†</sup>Authors for correspondence: bernhauve@faf.cuni.cz, marco.vignuzzi@pasteur.fr

## 1 Parameter fitting for viral decay models

Equations (1) and (2) were numerically simulated using the Python (Python Software Foundation, Python Language Reference, version 2.7, available at <https://www.python.org/>) function `scipy.integrate.ode` to quantify state variables, i.e.  $\log_{10} V^{\text{pfu}}$ ,  $\log_{10} V^{\text{rna}}$  at measured time points. We fit equations (1) and (2) to the respective datasets using the Python function `scipy.optimize.least_squares` for performing unconstrained optimization on variables employing Levenberg-Marquardt method (implemented as a flag `method='lm'`). The initial concentrations of encapsulated genomes and infectious virus in the first stage,  $V^{\text{rna}}(0)$  and  $V_1^{\text{pfu}}(0)$ , respectively, were subject to estimation. The initial concentrations of infectious virus in the remaining stages  $V_{k=2,\dots,n_{\text{pfu}}}^{\text{pfu}}(0)$  were set to zero. The objective functions ( $\text{SSR}_{\text{pfu}}$ ) and ( $\text{SSR}_{\text{rna}}$ ) subject to minimization are given in below.

Alternatively, analytical solutions of (1), i.e.,

$$V^{\text{rna}}(t) = V^{\text{rna}}(0) \exp\left(-\frac{1}{\tau_{\text{rna}}}t\right) \quad (\text{S1})$$

and (2), following [1], i.e.,

$$V_k^{\text{pfu}}(t) = V^{\text{pfu}}(0) \frac{\left(\frac{n_{\text{pfu}}}{\tau_{\text{pfu}}}t\right)^{k-1}}{(k-1)!} \exp\left(-\frac{n_{\text{pfu}}}{\tau_{\text{pfu}}}t\right) \quad (\text{S2})$$

can be considered to evaluate the state variables and objective function, with the initial concentrations of infectious virus and encapsulated genomes,  $V^{\text{rna}}(0)$  and  $V^{\text{pfu}}(0)$ , respectively, subject to estimation. In [2], solution of this form was proposed for the state transition model for eclipse cells at high MOI infection, assuming that all cells are infected at the beginning of an infection.

### 1.1 Encapsulated genomes

We fit equation (1) to experimental data described in Materials and Methods (Decay curves) by minimizing the weighted sum of squared residuals ( $\text{SSR}_{\text{rna}}$ ) between the logarithm of the  $j$ -th measurement at the  $i$ -th time point  $\log_{10} D_j^{\text{rna}}(t_i)$  and the respective logarithm of the solution  $\log_{10} V^{\text{rna}}(t_i)$  at the time point  $t_i$  given as

$$\text{SSR}_{\text{rna}} = \sum_{i,j} \left( \frac{\log_{10} V^{\text{rna}}(t_i) - \log_{10} D_j^{\text{rna}}(t_i)}{\sigma^{\text{rna}}(t_i)} \right)^2. \quad (\text{S3})$$

The weights were chosen to be the inverse of the sample standard deviations  $\sigma^{\text{rna}}(t_i)$  of the log-experimental measures of total encapsulated genomes at each measured time  $t_i$ .

## 33 1.2 Infectious virus

34 We fit equations (2) to experimental data described in Materials and Methods (Decay curves) by mini-  
 35 mizing the weighted sum of squared residuals ( $SSR_{\text{pfu}}$ ) between the logarithm of the  $j$ -th measurement  
 36 at the  $i$ -th time point  $\log_{10} D_j^{\text{pfu}}(t_i)$  and the respective logarithm of the solution  $\log_{10} \sum_{k=1}^{n_{\text{pfu}}} V_k^{\text{pfu}}(t_i)$   
 37 at the time point  $t_i$  given as

$$SSR_{\text{pfu}} = \sum_{i,j} \left( \frac{\log_{10} \sum_{k=1}^{n_{\text{pfu}}} V_k^{\text{pfu}}(t_i) - \log_{10} D_j^{\text{pfu}}(t_i)}{\sigma^{\text{pfu}}(t_i)} \right)^2, \quad (\text{S4})$$

38 The weights were chosen to be the inverse of the sample standard deviations  $\sigma^{\text{pfu}}(t_i)$  of the log-  
 39 experimental measures of infectious virus at each measured time  $t_i$ .

## 40 2 Weibull distributed decay of infectious ZIKV

41 The loss of ZIKV infectivity was also modelled following the assumption that infectious virus degra-  
 42 dation over time follows Weibull distribution, which can be mathematically expressed as [3, 7]:

$$V(t) = V_0^{\text{pfu}} \exp \left[ - \left( \frac{t}{\tau_{\text{pfu}}} \right)^D \right] \quad (\text{S5})$$

43 where  $\tau_{\text{pfu}}$  (measured in (h)) is an average time for an infectious virus to lose infectivity,  $D$  is the  
 44 scaling parameter and  $V_0^{\text{pfu}}$  is the initial concentration of infectious virus.

45 Equations (S5) were fit to experimental data described in Materials and Methods (Decay curves)  
 46 as above with the objective function to be minimized given as

$$SSR_{\text{pfu}} = \sum_{i,j} \left( \frac{\log_{10} V^{\text{pfu}}(t_i) - \log_{10} D_j^{\text{pfu}}(t_i)}{\sigma^{\text{pfu}}(t_i)} \right)^2. \quad (\text{S6})$$

47 The best-fit decay kinetics associated with the Weibull distribution model (S5) performed better  
 48 in terms of  $R^2$  compared to that yielded by both, the exponential and gamma distribution decay  
 49 models. However, the Weibull decay model did not perform better in terms of statistical significance  
 50 computed using the MCMC-accepted parameters than the gamma distribution model (equation (2)  
 51 in the main text) as p-value  $> 0.05$  (details on the calculation of the p-value are given in section 4  
 52 below). Incorporating the Weibull distributed viral decay into the model of virus-cell dynamics (3)  
 53 would be difficult, because the ‘age’ of each infectious unit needs to be followed over time. Thus, the  
 54 gamma distribution decay model was favored. Table S1 gives the best-fit values and 95% CrIs for  
 55 parameters in the model (S5). The 95% credible regions and parameter posterior distributions are in  
 56 Figure S2a and the associated dynamics in Figure S2b.

### 57 2.1 Parameter fitting for the main model (3)

58 Equations (3)+(4) were numerically simulated using the Python function `scipy.integrate.odeint` to  
 59 quantify state variables, i.e.  $\log_{10} V_{\text{low}}^{\text{pfu}}$ ,  $\log_{10} V_{\text{low}}^{\text{pfu, res}}$ ,  $\log_{10} V_{\text{low}}^{\text{rna}}$ ,  $\log_{10} V_{\text{high}}^{\text{pfu}}$ ,  $\log_{10} V_{\text{high}}^{\text{pfu, res}}$  and  $\log_{10} V_{\text{high}}^{\text{rna}}$   
 60 over the course of infection. Fitting equations (3) to the log of experimental data  $\log_{10} D_{\text{low}}^{\text{pfu}}$ ,  $\log_{10} D_{\text{low}}^{\text{rna}}$ ,  
 61  $\log_{10} D_{\text{high}}^{\text{pfu}}$  and  $\log_{10} D_{\text{high}}^{\text{rna}}$  was performed by minimizing the weighted sum of squared residuals  $SSR =$

62  $SSR_{\text{pfu}}^{\text{low}} + SSR_{\text{rna}}^{\text{low}} + SSR_{\text{pfu}}^{\text{high}} + SSR_{\text{rna}}^{\text{high}}$ , where

$$\begin{aligned}
SSR_{\text{pfu}}^{\text{low}} &= \frac{1}{N_{\text{pfu}}^{\text{low}}} \sum_{i=1}^8 \sum_{j=1}^3 \left( \frac{\log_{10} \sum_{k=1}^{n_{\text{pfu}}} \left( V_{k,\text{low}}^{\text{pfu}}(t_i) + V_{k,\text{low}}^{\text{pfu, res}}(t_i) \right) - \log_{10} D_{j,\text{low}}^{\text{pfu}}(t_i)}{\sigma_{\text{low}}^{\text{pfu}}(t_i)} \right)^2, \\
SSR_{\text{rna}}^{\text{low}} &= \frac{1}{N_{\text{low}}^{\text{rna}}} \sum_{i=1}^3 \sum_{j=1}^3 \left( \frac{\log_{10} V_{\text{low}}^{\text{rna}}(t_i) - \log_{10} D_{j,\text{low}}^{\text{rna}}(t_i)}{\sigma_{\text{low}}^{\text{rna}}(t_i)} \right)^2, \\
SSR_{\text{pfu}}^{\text{high}} &= \frac{1}{N_{\text{pfu}}^{\text{high}}} \sum_{i=1}^8 \sum_{j=1}^3 \left( \frac{\log_{10} \sum_{k=1}^{n_{\text{pfu}}} \left( V_{k,\text{high}}^{\text{pfu}}(t_i) + V_{k,\text{high}}^{\text{pfu, res}}(t_i) \right) - \log_{10} D_{j,\text{high}}^{\text{pfu}}(t_i)}{\sigma_{\text{high}}^{\text{pfu}}(t_i)} \right)^2, \\
SSR_{\text{rna}}^{\text{high}} &= \frac{1}{N_{\text{high}}^{\text{rna}}} \sum_{i=1}^4 \sum_{j=1}^3 \left( \frac{\log_{10} V_{\text{high}}^{\text{rna}}(t_i) - \log_{10} D_{j,\text{high}}^{\text{rna}}(t_i)}{\sigma_{\text{high}}^{\text{rna}}(t_i)} \right)^2,
\end{aligned} \tag{S7}$$

63 using the Python function `scipy.optimize.least_squares` for performing optimization on vari-  
64 ables employing Levenberg-Marquardt method (unconstrained optimization implemented as a flag  
65 `method='lm'`). The weights were chosen to be the inverse of the sample standard deviations of the  
66 log-experimental measures of infectious virus and encapsulated genomes  $\sigma_{\text{low}}^{\text{pfu}}(t_i)$ ,  $\sigma_{\text{low}}^{\text{rna}}(t_i)$ ,  $\sigma_{\text{high}}^{\text{pfu}}(t_i)$  and  
67  $\sigma_{\text{high}}^{\text{rna}}(t_i)$  at each measured time  $t_i$  of low and high MOI dataset. We summed over the total number  
68 of measurements of infectious virus  $N_{\text{low}}^{\text{pfu}}$  and  $N_{\text{high}}^{\text{pfu}}$ , and encapsulated genomes  $N_{\text{low}}^{\text{rna}}$  and  $N_{\text{high}}^{\text{rna}}$ . Since  
69 we excluded data points bellow the limit of detection, we accounted for different number of measure-  
70 ments of infectious virus and encapsulated genomes by normalizing against the respective number of  
71 measurements  $N_{\text{low}}^{\text{pfu}}$ ,  $N_{\text{high}}^{\text{pfu}}$ ,  $N_{\text{low}}^{\text{rna}}$  and  $N_{\text{high}}^{\text{rna}}$ .

### 72 3 Virus sampling for quantification

73 Each experimental measurement of infectious virus and encapsulated genome concentrations,  $V_k^{\text{pfu}}$ ,  
74  $k = 1, \dots, n_{\text{pfu}}$  and  $V^{\text{rna}}$ , respectively, should be reduced by 6.5% to account for the supernatant  
75 extraction at each measured time. However, the amount of virus in such a small sample is rather  
76 negligible compared to the total viral load in the supernatant and thus has only negligible impact on the  
77 overall virus dynamics. To simulate the punctual extraction of the supernatant at measured times and  
78 to show that sampling has negligible effect on the viral dynamics, we stopped the numerical integration  
79 at each time  $t = 0\text{h}, 4\text{h}, 6\text{h}, 8\text{h}, 24\text{h}, 48\text{h}, 72\text{h}, 96\text{h}$  and subtract 6.5% out of the total concentration  
80 from each stage of infectious virus concentration  $V_k^{\text{pfu}}$ ,  $k = 1, \dots, n_{\text{pfu}}$  and encapsulated genome  
81 concentrations  $V^{\text{rna}}$  and re-initiate the simulation with these reduced values as new initial conditions.  
82 This routine is repeated at every measured time point. We show the best-fit solution of the model  
83 (3)+(4) (best-fit parameter values are in Table 4) with and without sampling adjustment in Figure  
84 S3.

### 85 4 MCMC computations and statistical analysis

86 To infer posterior parameter distributions, we employed a Python module `emcee` [4], which is an  
87 implantation of Goodman and Weare's Affine Invariant Markov chain Monte Carlo (MCMC) Ensemble  
88 sampler [5]. Twenty walkers were log-uniformly distributed within the close proximity of the best-fit  
89 parameter set to perform MCMC inference. A proposed step  $\vec{x}$  was accepted or rejected with the  
90 acceptance probability  $\exp^{-0.5 \times SSR(\vec{x})}$  (as in [6]), where  $SSR(\vec{x})$  is the weighted sum of squared  
91 residuals between the solution of the model and experimental measurements. For viral decay models  
92 (1), (2) and (S5) we implemented a burn-in of 200 steps for each MCMC run. Another 1,000 steps  
93 were run, thus totalling in 20,000 parameter sets that were used to generate the posterior parameter

94 distributions.

95 In the case of the main model (3)+(4), we ran the MCMC process for 60,000 steps, totalling in  
96 1,200,000 parameter sets. The convergence of the MCMC samples was graphically inspected. Due  
97 to computational limitations, we performed thinning to reduce autocorrelation in MCMC chains and  
98 kept every tenth parameter set for each chain. The autocorrelation function ( $AF C_k$ ), calculated as

$$AF C_k = \frac{s_k}{s_0}, k \geq 0, \quad (\text{S8})$$

99 where

$$s_k = \frac{1}{n} \sum_{i=k+1}^n (y_i - \bar{y})(y_{i-k} - \bar{y}), \quad (\text{S9})$$

100 and  $\bar{y}$  and  $s_0$  are the mean and variance of the time series  $y_1, \dots, y_n$ , respectively, was plotted to assess  
101 the correlation between the samples  $k$  steps apart (Figure S4, lag on x-axis). The Figure S4a shows  
102 values of the lag- $k$  ACF against increasing values of  $k$  for unthinned chains. The autocorrelation values  
103 drop slowly for larger  $k$  for the parameters  $\beta$ ,  $\tau_E$ ,  $\tau_I$ ,  $p_{\text{pfu}}$  compared to the parameters  $V_h^{\text{pfu}}(0)$  and  
104  $V_h^{\text{rna}}(0)$ . Autocorrelation after thinning on Markov chains is displayed in Figure S4b.

105 Trace plots in Figure S5 show the sampled values of the model parameters over time. This plot  
106 helps to judge how rapidly the MCMC process converges to marginal parameter posterior distribution.  
107 For the parameters  $\beta$ ,  $\tau_E$ ,  $\tau_I$ ,  $p_{\text{pfu}}$  and  $p_{\text{rna}}$ , the chains seem well burnt after approximately 2500 steps.  
108 We thus set the burn-in to double, i.e. 5000 steps. The thinned samples, after the burn-in was  
109 discarded, were used to generate the posterior parameter distributions in Figure 5 the main text.

110 Statistical significance was quantified using a bootstrap t-test. To determine whether two math-  
111 ematical models of viral decay are statistically different (one model performs better than the other),  
112 we calculated the Akaike Information Criterion for small sample size  $AIC_C$  as

$$AIC_C = n \log \left( \frac{SSR}{n} \right) + 2k + 2k \frac{k+1}{n-k-1}. \quad (\text{S10})$$

113 We then sampled (with replacement) 1000 parameter sets out of the total of 20000 parameter sets  
114 obtained from MCMC simulation for each viral decay model and calculated the fraction of times the  
115  $AIC_C$  of one model was smaller than that of the other. We repeated the procedure one hundred times  
116 and calculated the final p-value as the mean of all bootstrap p-values.

117 **References**

118 [1] Hurtado PJ, Kirosingh AS. 2019. Generalizations of the ‘Linear Chain Trick’: incorporating  
119 more flexible dwell time distributions into mean field ODE models. *Journal of Mathematical*  
120 *Biology* 79:1831–1883.

121 [2] Kakizoe Y, Nakaoka S, Beauchemin CA, Morita S, Mori H, Igarashi T, Aihara K, Miura T,  
122 Iwami S. 2015. A method to determine the duration of the eclipse phase for in vitro infection  
123 with a highly pathogenic SHIV strain. *Scientific Reports*. 5:10371.

124 [3] Okagbue HI, Adamu MO, Anake TA. Ordinary Differential Equations of the Probability Func-  
125 tions of the Weibull Distribution and their Application in Ecology. 2017. *Journal of Economic*  
126 *Literature (JEL)*.

127 [4] Foreman-Mackey D, Hogg DW, Lang, D and Goodman J. 2013. emcee: the MCMC hammer.  
128 *Publications of the Astronomical Society of the Pacific* 125:306–312.

129 [5] Goodman J and Weare J. 2010. Ensemble samplers with affine invariance. *Communications in*  
130 *applied mathematics and computational science* 5:65–80.

131 [6] Paradis EG, Pinilla LT, Holder BP, Abed Y, Boivin G, Beauchemin CA. 2015. Impact of the  
132 H275Y and I223V mutations in the neuraminidase of the 2009 pandemic influenza virus in vitro  
133 and evaluating experimental reproducibility. *PLoS One* 10(5):e0126115.

134 [7] Beauchemin CAA, Kim YI, YuQ, Ciaramella G, DeVincenzo JP. 2019. Uncovering critical prop-  
135 erties of the human respiratory syncytial virus by combining in vitro assays and in silico analyses.  
136 *PLoS One* 14:e0214708.

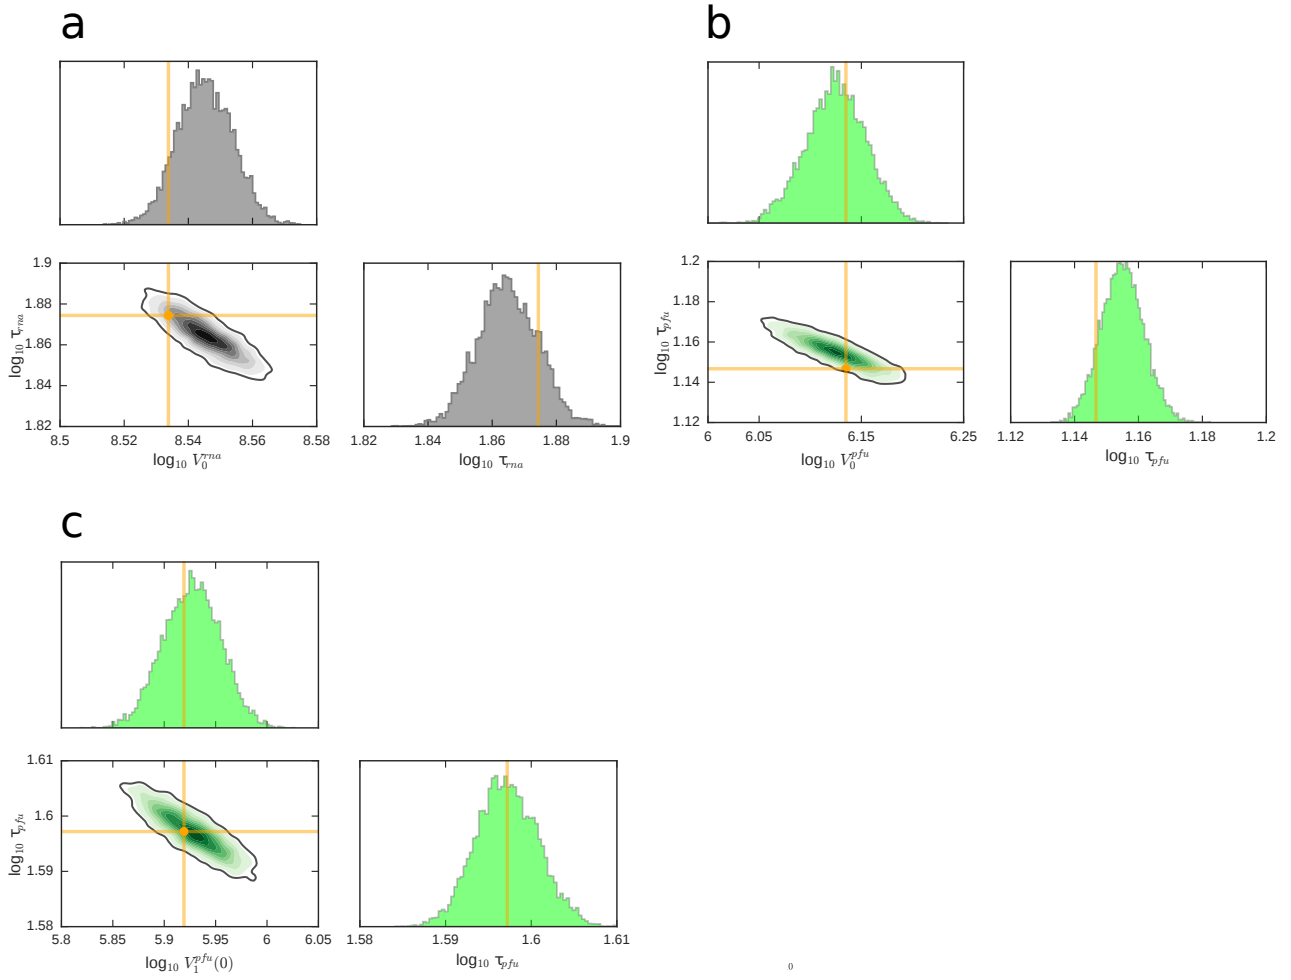

**Figure S1.** Parameter posterior distributions and pair-wise posterior plots obtained from MCMC run of the decay model for **(a)** encapsulated genomes (equation (1)) and **(b-c)** infectious virus (equations (2)), assuming **(b)** exponentially distributed decay time ( $n_{pfu} = 1$ ) and **(c)** gamma distributed decay time ( $n_{pfu} = 8$ ). The orange targets indicate the best-fit parameter values given in Tables **(a)** 2 and **(b-c)** 3. The solid dark lines enclose the 95% credible regions.

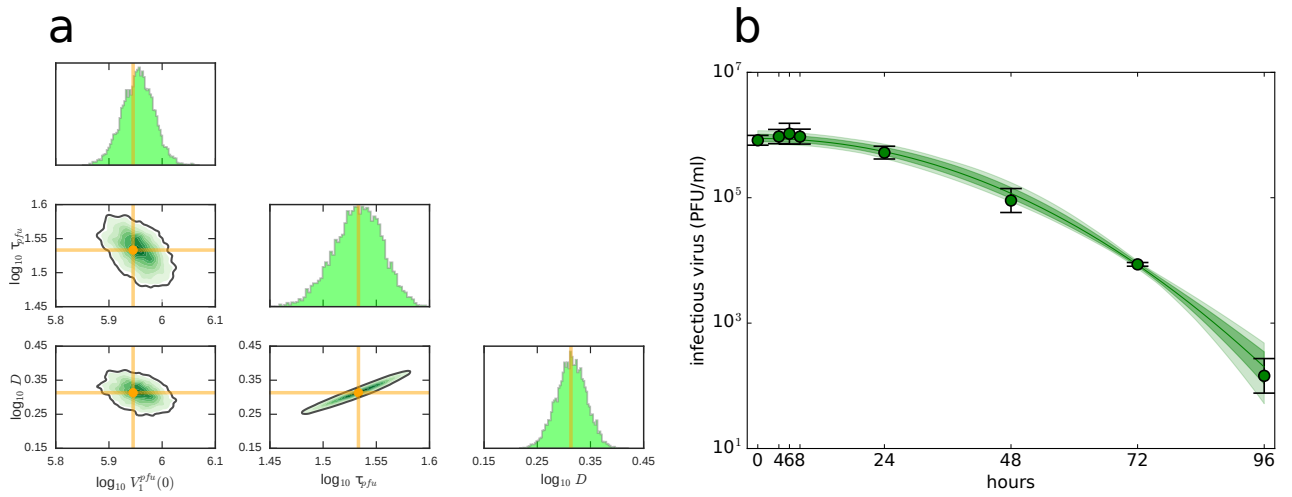

**Figure S2.** (a) Parameter posterior distributions and pair-wise posterior plots obtained from MCMC run of the Weibull decay model (S5). The solid dark lines enclose the 95% credible regions. (b) The best-fit of the model (S5) is displayed as a solid green line. The light shading around the best-fit corresponds to the model kinetics associated with MCMC-accepted parameters. The dark shading represents 95% credible region. Data are shown as the mean  $\pm$  standard deviation.

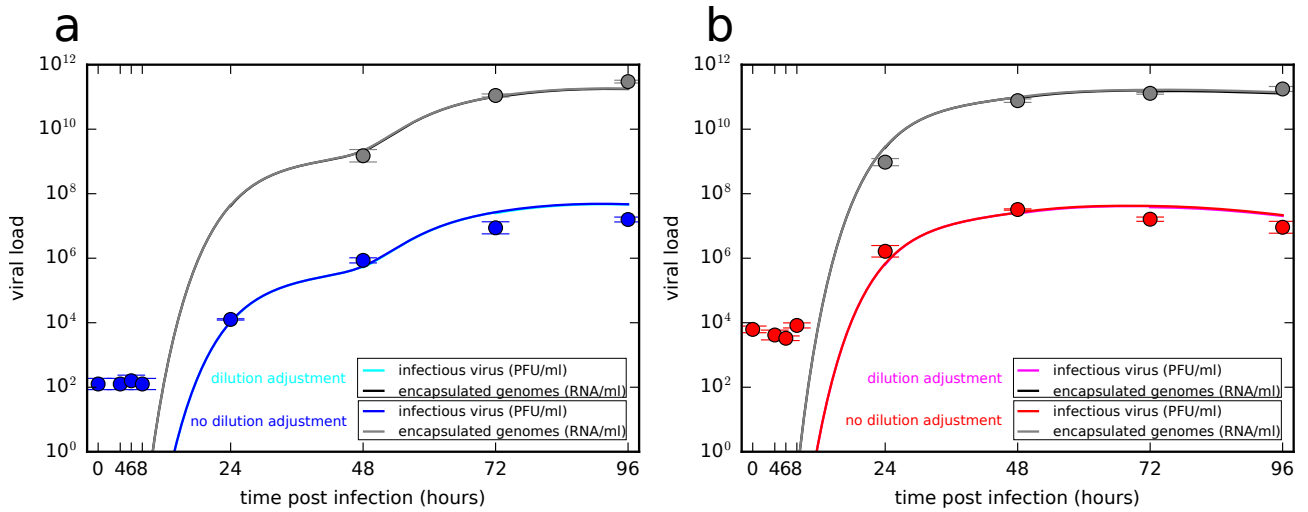

**Figure S3.** Simulated time course dynamics of infectious virus and encapsulated genomes yielded by the model (3)+(4) using the best-fit parameters in Table 4 and taking timely extractions of the supernatant into account. (a) low MOI infection dynamics, (b) high MOI infection dynamics. In both figures, 'no dilution adjustment' refers to the continuous simulation whereas 'dilution adjustment' refers to the sequentially restarted simulation where we adjust for removal of the supernatant for quantification.

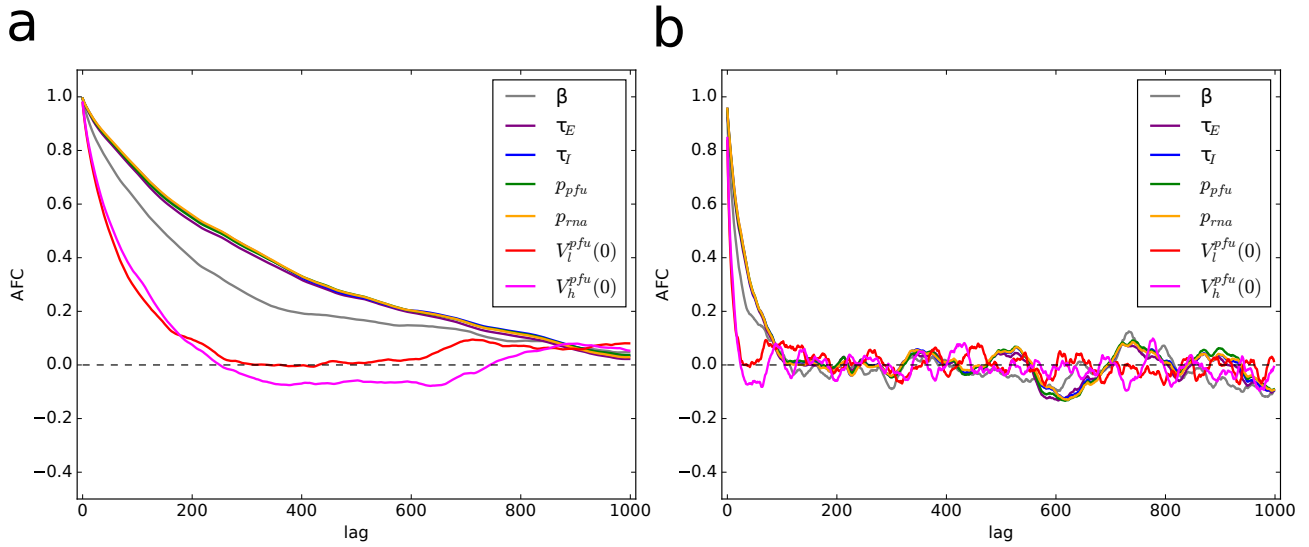

**Figure S4.** Graphical diagnostics of the MCMC run. Autocorrelation of the parameters as a function of the sample lag in one of the (a) unthinned and (b) thinned Markov chains. Thinning was performed using every tenth parameter set in each chain to reduce autocorrelation.

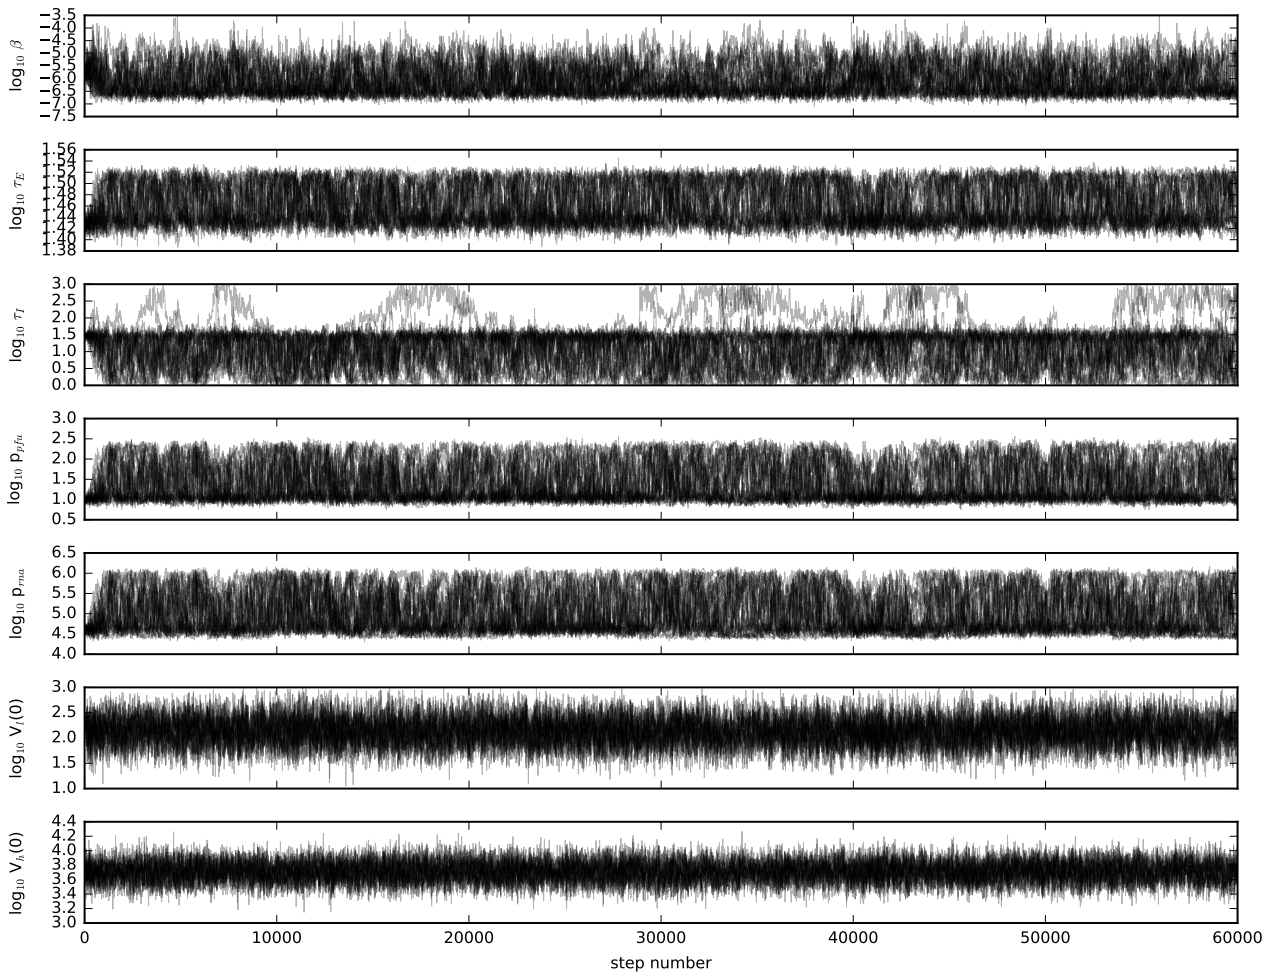

**Figure S5.** Trace plots of the thinned MCMC chains.



**Table S1.** Parameter values obtained from fitting equations (S5) to infectious virus decay data and 95% CrRs were constructed from the MCMC fits of the model (S5).

| parameter                                     | description                    | value | 95% CrR        |
|-----------------------------------------------|--------------------------------|-------|----------------|
| $\tau_{\text{pfu}}$<br>(h)                    | decay time of infectious virus | 34.14 | [30.60, 37.57] |
| $D$<br>(dimension-less)                       | scaling constant               | 2.06  | [1.81, 2.33]   |
| $V_0^{\text{pfu}}$<br>( $\times 10^5$ PFU/ml) | initial infectious virus       | 8.82  | [7.85, 10.28]  |
